# Supplementary material
Source: ML conference proceedings conference paper supplement (https://openreview.net/forum?id=Lixj7WEGEy)
Supplement: supplementary_material [file attachment]

# Appendix

374

## 375 A Comparison Experiments

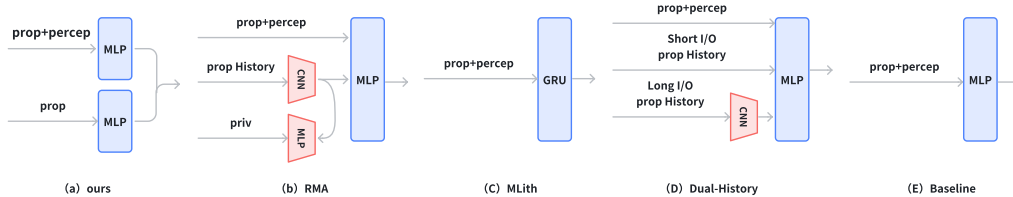

Figure 6: Comparative analysis of methods

376 To demonstrate our method’s effectiveness, we compared it with RMA, MLith, Dual-History, and  
377 the baseline (Figure 6)[31, 20, 32]. Comprehensive experiments in complex environments show that  
378 while each method has strengths, ours excels in robustness, especially when perception fails. Our  
379 approach is superior in obstacle avoidance and climbing, where other methods often fail without  
380 external perception support, as shown in Table 3.

381 These results highlight our method’s efficiency, applicability, and adaptability in real-world applica-  
382 tions, enhancing robot autonomy and safety in dynamic environments.

Table 3: Performance Comparison

| Method       | Up Stair Success | Down Stair Success | Discrete Success | Stair XMD | Discrete XMD |
|--------------|------------------|--------------------|------------------|-----------|--------------|
| Ours         | 97%              | 100%               | 90%              | 19.97     | 17.04        |
| Ours w/o VAE | 87%              | 100%               | 90%              | 16.42     | 14.99        |
| MLith        | 0%               | 100%               | 84%              | 9.4       | 14.61        |
| Dual-History | 0%               | 100%               | 82%              | 10.9      | 13.77        |
| Baseline     | 0%               | 100%               | 76%              | 7.8       | 11.53        |

## 383 B Ablation Studies

384 We conducted ablation experiments from multiple angles to examine the effectiveness of our policy  
385 in various aspects. The main ablation experiments we performed were:

386

- 387 • **Without VAE and cooperation regularization.**
- 388 • **Without pre-training the blind policy in the first stage.**
- 389 • **Our method with KL adaptive learning rate.**

390 The experimental results are shown in Figure 7. We found that both the VAE and our regularization  
391 term contribute to improving the final performance. Additionally, without the pre-trained model,  
392 training often fails, likely due to the difficulty in converging when training multi-agent systems.  
393 Moreover, this multi-agent training approach is very sensitive to the learning rate; an excessively  
394 high learning rate or adaptive adjustment of the learning rate can easily cause gradient explosion.

## 395 C Outdoors Experiments

396 We tested our controller across various outdoor terrains, which included actions such as climbing  
397 and dodging in complex terrains using perception, as well as navigating through grass, slopes, soft  
398 soil, and steps in cases where perception suddenly failed, as illustrated in Figure 8 and based on  
399 methodologies described by Li et al. [31].

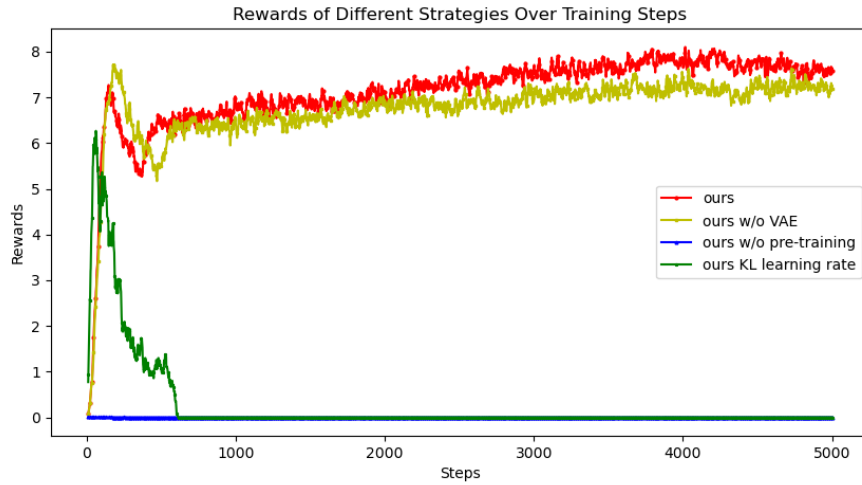

Figure 7: Rewards of Different Strategies Over Training Steps

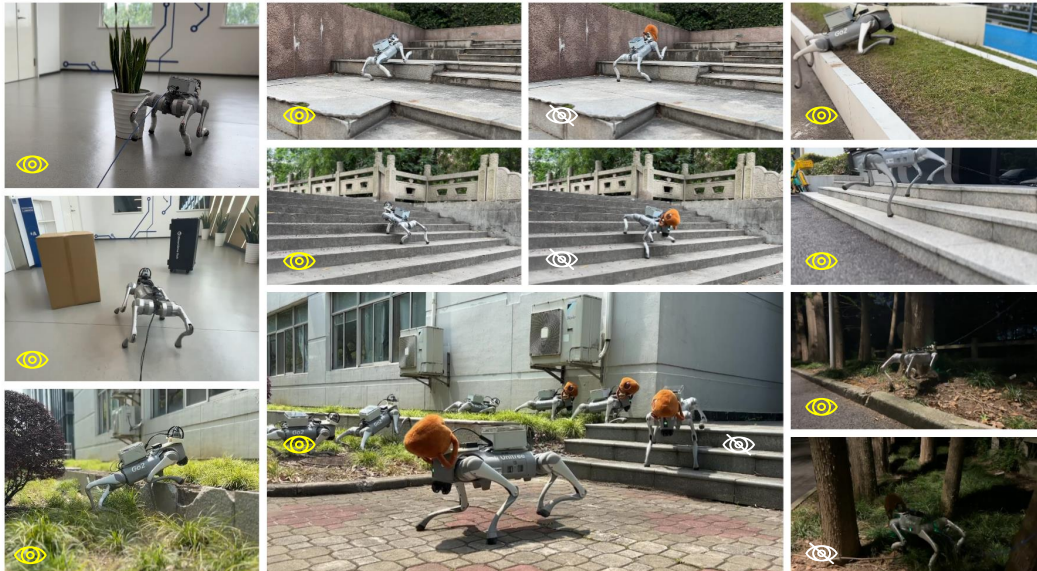

Figure 8: Performance of Robot in Various Terrains.

400 **D Reward Functions**

401 We used the reward function as shown in Table 4, where the Task reward guides the robot to track the  
 402 desired speed and complete motions on various terrains. Our setting for the regularization reward  
 403 refers to Long et al. [33]; Kumar et al. [32]; Agarwal et al. [20]; Cheng et al. [4]. Through extensive  
 404 training trials, we optimized our reward weight settings to ensure that the robot moves in a relatively  
 405 ideal manner.

Table 4: Reward Functions

| Reward Type                  | Equation                                                                      | Weight                |
|------------------------------|-------------------------------------------------------------------------------|-----------------------|
| <b>Task Reward</b>           |                                                                               |                       |
| Linear Velocity Tracking     | $\exp \left\{ -\frac{\ v_{xy}^{cmd} - v_{xy}\ ^2}{2\sigma} \right\}$          | 1.5                   |
| Angular Velocity Tracking    | $\exp \left\{ -\frac{(\omega_{yaw}^{cmd} - \omega_{yaw})^2}{\sigma} \right\}$ | 0.5                   |
| Linear Velocity Z            | $v_z^2$                                                                       | -1.0                  |
| Angular Velocity XY          | $\omega_x^2 + \omega_y^2$                                                     | -0.1                  |
| <b>Regularization Reward</b> |                                                                               |                       |
| Z Velocity                   | $v_z^2$                                                                       | -1.0                  |
| X & Y Velocity               | $\ \omega_{xy}\ _2^2$                                                         | -0.1                  |
| Orientation                  | $\ g\ _2^2$                                                                   | -0.7                  |
| Dof Acceleration             | $\sum_{i=1}^{12} \ddot{q}_i^2$                                                | $-1.5 \times 10^{-7}$ |
| Collision                    | $r_{Collision}(7)$                                                            | -20.0                 |
| Action Rate                  | $\ a_t - a_{t-1}\ _2^2$                                                       | -0.11                 |
| Delta Torques                | $\sum_{i=1}^{12} (\tau_t - \tau_{t-1})^2$                                     | $-1.0 \times 10^{-7}$ |
| Torques                      | $\sum_{i=1}^{12} \tau_t^2$                                                    | -0.00001              |
| Hip Position                 | $r_{Pos}(6)$                                                                  | -0.8                  |
| Dof Error                    | $\sum_{i=1}^{12} (q - q_{default})^2$                                         | -0.04                 |
| Feet Stumble                 | $ F_{feet}^{hor}  > 4 \times  F_{feet}^{ver} $                                | -2                    |
| Termination                  | -                                                                             | -5                    |
| Dof Position Limits          | $\sum_{i=1}^{12} (q_i^{out}, q_i > q_{max} \vee q_i < q_{min})$               | -13.0                 |

## 406 E Training Details

407 **Robot Domain Randomizations:** During the training process, we utilized the following domain  
408 randomization parameters to enhance the robustness of our policy. The range of randomization was  
409 referenced from Long et al. [33]; Wu et al. [34]. In actual robots, factors such as communication  
410 delays can lead to action execution delays of approximately 20ms. Therefore, domain randomiza-  
411 tion of action delays during robot training significantly improved the real-world performance of the  
412 robots.

Table 5: Robot Domain Randomizations

| Parameter               | Range [Min, Max]                      |
|-------------------------|---------------------------------------|
| Base Mass               | $[0,3] \times \text{default kg}$      |
| CoM                     | $[-0.2,0.2] \times \text{default m}$  |
| Ground Friction         | $[0.6, 2.0]$                          |
| Motor Strength          | $[0.8, 1.2] \times \text{default Nm}$ |
| Joint Kp                | $[0.8, 1.2] \times \text{default}$    |
| Joint Kd                | $[0.8, 1.2] \times \text{default}$    |
| Initial Joint Positions | $[0.5,1.5] \times \text{default}$     |
| System Delay            | $[0,20]$ ms                           |
| Robot Pushing Interval  | 8s                                    |
| Push Velocity XY        | $[0, 0.5]$ m/s                        |

413 **Heightmaps Domain Randomizations:** We utilize the ‘Fast\_lio’ odometer[35] and the method  
414 from P. Fankhauser and M. Hutter’s[24] to construct the elevation map. Due to inherent random  
415 errors typically associated with laser odometry in practical deployments, we have implemented do-  
416 main randomization for both the elevation map and the z-axis height of the robot’s base.

Table 6: Heightmap Domain Randomizations

| Parameter                     | Range [Min, Max] |
|-------------------------------|------------------|
| Height map updates delay      | 100ms            |
| Robot base Z Noisy            | [-0.05,0.05] m   |
| Height Gaussian Noisy         | [-0.02, 0.02] m  |
| Height Spike Noisy Proportion | 5%               |
| Height Spike Noisy            | [0.1, 0.5]       |

417 **Terrains Setting:** We have designed a training environment containing six different types of terrains:  
 418 slopes, stairs, discrete obstacles, pits, gaps, and pillars. The first three terrains are relatively easier for  
 419 robot navigation, while the latter three require more reliance on external perception for anticipation.

420 • **Phase One: Blind Policy Training**

Table 7: Terrain Parameters and Proportion in Blind Policy Training

| Terrain            | Proportion | Parameters                   |
|--------------------|------------|------------------------------|
| Slope              | 30%        | Inclination: [0, 40]         |
| Stairs             | 60%        | Step Height: [2cm, 15cm]     |
| Discrete Obstacles | 10%        | Obstacle Height: [3cm, 18cm] |

421 • **Phase Two: Advanced Perceptual Policy Training**

Table 8: Terrain Parameters and Proportion in Advanced Perceptual Policy Training

| Terrain         | Proportion | Parameters                                              |
|-----------------|------------|---------------------------------------------------------|
| Slope           | 10%        | Inclination: [0, 40]                                    |
| Stairs          | 60%        | Step Height: [2cm, 15cm]                                |
| Complex Terrain | 30%        | Pit: [0.1m, 0.45m];                                     |
|                 |            | Gap: [0.15m, 0.45m];                                    |
|                 |            | Pillar: size [0.4m, 0.6m], center distance [1.6m, 1.4m] |

422 **Hyperparameters:** Tables 9 and 10 list the hyperparameters used during our two-stage training  
 423 process. It is important to note that multi-agent training, especially with MAPPO, is quite sensitive  
 424 to hyperparameter settings, for which we referred to the settings recommended in Yu et al. [15]. We  
 425 observed that the learning rate particularly impacts multi-agent training, where an excessively high  
 426 learning rate can lead to issues such as gradient explosion.

427 • **Phase One: Blind Policy Training**

Table 9: PPO Parameters in Blind Policy Training

| Parameter                       | Value                     |
|---------------------------------|---------------------------|
| Discount factor                 | 0.99                      |
| GAE discount factor             | 0.95                      |
| Timesteps per rollout           | 21                        |
| Epochs per Rollout              | 5                         |
| Minibatches per Epoch           | 4                         |
| Entropy Bonus                   | 0.01                      |
| Value Loss Coefficient          | 1.0                       |
| Clip range                      | 0.2                       |
| Learning rate                   | KL Adaptive Learning Rate |
| Desired KL Divergence           | 0.01                      |
| Environments                    | 4096                      |
| Policy control frequency        | 50hz                      |
| PD controller frequency         | 200hz                     |
| Using history encoder frequency | 20                        |
| Action Penalty Coefficient      | 0.1                       |

428

- **Phase Two: Advanced Perceptual Policy Training**

Table 10: PPO Parameters in Advanced Perceptual Policy Training

| Training Parameter              | Blind Policy       | Perceptive Policy  |
|---------------------------------|--------------------|--------------------|
| Discount factor                 | 0.99               | 0.99               |
| GAE discount factor             | 0.95               | 0.95               |
| Timesteps per rollout           | 21                 | 21                 |
| Epochs per Rollout              | 5                  | 5                  |
| Minibatches per Epoch           | 4                  | 4                  |
| Entropy Bonus                   | 0.01               | 0.01               |
| Value Loss Coefficient          | 1.0                | 1.0                |
| Clip range                      | 0.2                | 0.2                |
| Learning rate                   | $1 \times 10^{-5}$ | $1 \times 10^{-4}$ |
| Environments                    | 4096               | 4096               |
| Using history encoder frequency | 20                 | None               |
| Action Penalty Coefficient      | None               | 0.01               |

429 **F Sim2Real Details**

430 In sim2real deployment, our lidar and robot parameters, as shown in Table 11, are based on configurations recommended by Agarwal et al. [20].

431

Table 11: Sim2real Parameters

| Parameter                                    | Value                                      |
|----------------------------------------------|--------------------------------------------|
| Radar relative to base coordinates (xyz rpy) | [-0.33, 0, -0.35, -0.1, -0.55, 0]          |
| Point cloud clipping height                  | [-0.5m, +0.5m]                             |
| Elevation map update frequency               | 50Hz                                       |
| Other coefficients for elevation maps        | size: 3m $\times$ 3m, resolution: 0.05m    |
| Odometer update frequency                    | 10Hz                                       |
| Blind Policy frequency                       | 50Hz (synchronized with Perceptive Policy) |
| Perceptive Policy frequency                  | 50Hz (synchronized with Blind Policy)      |
| PD controller frequency                      | 1kHz                                       |
| Joint Kp                                     | 40                                         |
| Joint Kd                                     | 40                                         |
